# Supplementary material for: Interesting influence of Al2O3 on the catalytic stability of Co2P, MoP and CoMoP catalysts for dry reforming of methane
Source: Royal Society of Chemistry journal article supplement (doi:10.1039/d3dt02464d), 2023-01-01
Supplement: d3dt02464d1.pdf [file d3dt02464d1.pdf]

## Supplementary Information

### Interesting influence of Al<sub>2</sub>O<sub>3</sub> on the catalytic stability of Co<sub>2</sub>P, MoP and CoMoP catalysts for dry reforming of methane

Shuo Chen, Qingshan Rong, Dongmei Liu,\* Na Sun and Zhiwei Yao\*

School of Petrochemical Engineering, Liaoning Petrochemical University, Fushun,  
113001, P.R. China.

Corresponding author:

Dongmei Liu (E-mail: ldmwain1234@163.com)

Zhiwei Yao (E-mail: mezhiwei@163.com)

#### 1. Experimental Section

##### 1.1 Sample preparation

The unsupported oxide precursors were prepared by stirring an aqueous solution of Co(CH<sub>3</sub>COO)<sub>2</sub>·4H<sub>2</sub>O, (NH<sub>4</sub>)<sub>6</sub>Mo<sub>7</sub>O<sub>24</sub>·4H<sub>2</sub>O and (NH<sub>4</sub>)<sub>2</sub>HPO<sub>4</sub> with a given molar ratio of Co:Mo:P=x:y:1 (x=2, y=0; x=0, y=1; x=1, y=1) at room temperature (RT) for 0.5 h. The alumina-supported oxide precursors were prepared by the incipient wetness method using the solutions mentioned above and commercial Al<sub>2</sub>O<sub>3</sub> (γ-Al<sub>2</sub>O<sub>3</sub>, 99.99%, purchased from Shanghai Macklin Biochemical Technology Co. Ltd.) with theoretical loading of 30 wt.% M (M=Co for Co<sub>2</sub>P and M=Mo for MoP and CoMoP). All the oxide precursors followed by a long time drying at 110 °C and 3 h-calcination at 500 °C. The metal phosphides were prepared from unsupported and alumina-supported oxide precursors via H<sub>2</sub>-reduction method described in our previous study.<sup>24</sup> The final

reduction temperatures were 850 °C for Co<sub>2</sub>P and CoMoP phosphides, and 950 °C for MoP phosphides.

## 1.2 Sample characterization

X-ray diffraction (XRD) examinations were conducted using an X-ray diffractometer (X'Pert Pro MPD) with a Cu K $\alpha$  radiation. The BET surface areas were measured on a NOVA4200 instrument. Carbon content was determined using an elemental analyzer (Euro EA3000). The scanning electron microscopy (SEM) and energy dispersive X-ray spectroscopy (EDX) element mapping images were obtained on Hitachi S-4800. The H<sub>2</sub>-TPR analysis was performed in a quartz tube micro-reactor and the effluent gases were monitored using a thermal conductivity detector. Prior to the H<sub>2</sub>-TPR run, the unsupported (0.05 g) and supported (0.1 g) oxide precursors were initially pretreated in Ar flow at 300 °C for 0.5 h. After being cooled to RT, the samples were heated from RT to 900 °C using 10%H<sub>2</sub>/Ar (30 ml min<sup>-1</sup>) at a rate of 4 °C min<sup>-1</sup>. CO<sub>2</sub> (CH<sub>4</sub>) dissociation study was performed with 6%CO<sub>2</sub>(6%CH<sub>4</sub>)/Ar mixture flowing at a rate of 50 ml min<sup>-1</sup>. Before the dissociation reaction, the sample (0.1 g) was preheated at 850 or 900 °C under an H<sub>2</sub> flow for 0.5 h and then cooled to 800 °C in Ar. Then the gas mixture was allowed to pass through the sample. The change of CH<sub>4</sub> and CO<sub>2</sub> during reaction was monitored using gas chromatography (GC).

## 1.3 Catalytic performance tests

The DRM reaction was carried out in a fixed-bed flow system and the catalytic activity of catalyst was tested in a micro-reactor (id: 8 mm) at atmospheric pressure.

The feed gas consisted of 10 ml min<sup>-1</sup> of 50%CH<sub>4</sub> and 50%CO<sub>2</sub>. The pretreatment process and gas detection device were similar to those in CO<sub>2</sub> (CH<sub>4</sub>) dissociation study. The CH<sub>4</sub> conversion, CO<sub>2</sub> conversion and carbon balance were defined as follows ( $n_{i,in}$  = the initial molar fraction of component  $i$  in the feed,  $n_{i,out}$  = the final molar fraction of component  $i$  in the gaseous effluent):

$$X_{\text{CH}_4}(\%) = \frac{n_{\text{CH}_4,\text{in}} - n_{\text{CH}_4,\text{out}}}{n_{\text{CH}_4,\text{in}}} \times 100$$

$$X_{\text{CO}_2}(\%) = \frac{n_{\text{CO}_2,\text{in}} - n_{\text{CO}_2,\text{out}}}{n_{\text{CO}_2,\text{in}}} \times 100$$

$$B_C = \frac{(n_{\text{CO}_2,\text{out}} + n_{\text{CH}_4,\text{out}} + n_{\text{CO}_2,\text{out}})}{(n_{\text{CH}_4,\text{in}} + n_{\text{CO}_2,\text{in}})}$$

## 2. Results

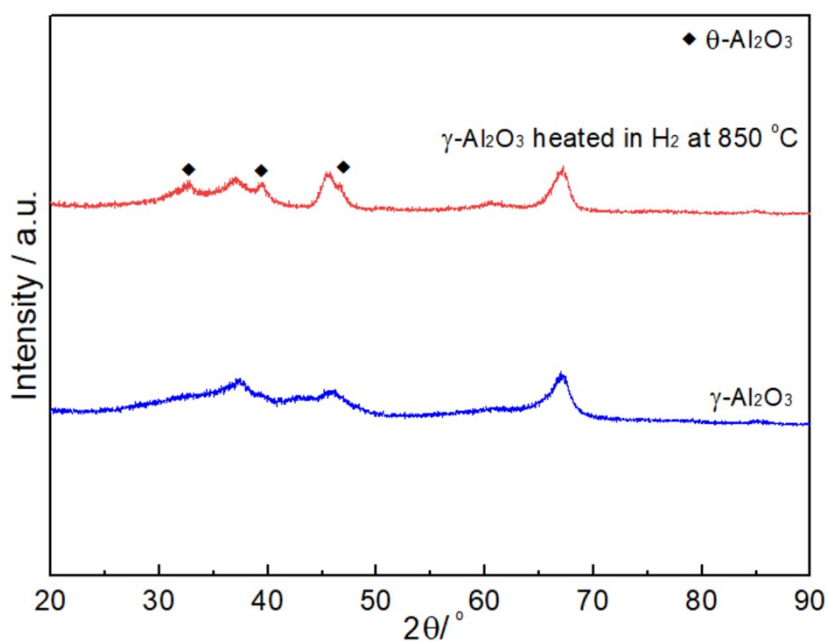

Fig. S1 XRD patterns of fresh  $\gamma$ -Al<sub>2</sub>O<sub>3</sub> and the  $\gamma$ -Al<sub>2</sub>O<sub>3</sub> heated in H<sub>2</sub> at 850 °C.

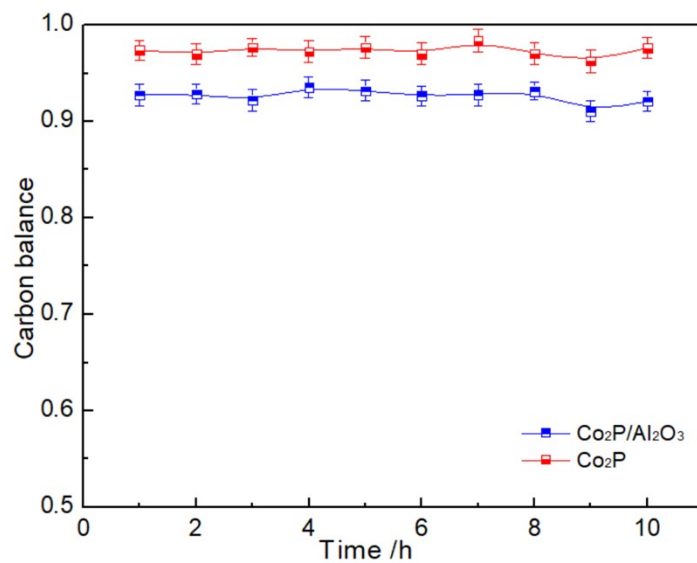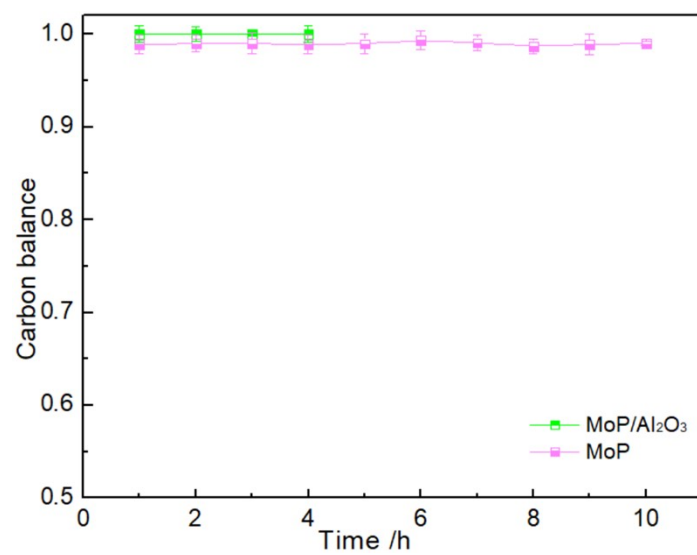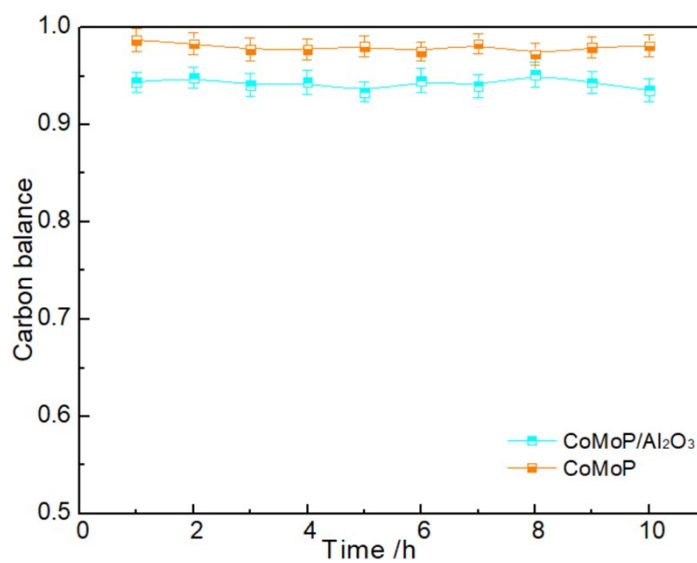

Fig. S2 Carbon balance value versus reaction time.

Table S1 CH<sub>4</sub> conversion rate and specific activity of phosphide catalysts for DRM.

| Catalyst                                         | CO chemisorption<br>( $\mu\text{mol g}^{-1}$ ) | CH <sub>4</sub> conversion rate                       |                   | Specific activity                |      |
|--------------------------------------------------|------------------------------------------------|-------------------------------------------------------|-------------------|----------------------------------|------|
|                                                  |                                                | ( $\mu\text{mol g}_{\text{cat}}^{-1} \text{s}^{-1}$ ) |                   | ( $\text{s}^{-1}$ ) <sup>a</sup> |      |
|                                                  |                                                | 1 h                                                   | 10 h              | 1 h                              | 10 h |
| Co <sub>2</sub> P                                | 2.2                                            | 21.42                                                 | 21.06             | 9.74                             | 9.57 |
| MoP                                              | 2.8                                            | 33.17                                                 | 33.05             | 11.85                            | 11.8 |
| CoMoP                                            | 3.4                                            | 29.36                                                 | 26.60             | 8.64                             | 7.82 |
| Co <sub>2</sub> P/Al <sub>2</sub> O <sub>3</sub> | 31.3                                           | 33.40                                                 | 33.54             | 1.07                             | 1.07 |
| MoP/Al <sub>2</sub> O <sub>3</sub>               | 35.4                                           | 13.24                                                 | 2.53 <sup>b</sup> | 0.37                             | 0.07 |
| CoMoP/Al <sub>2</sub> O <sub>3</sub>             | 36.8                                           | 31.00                                                 | 29.77             | 0.84                             | 0.81 |

<sup>a</sup>(CH<sub>4</sub> conversion rate)/(chemisorbed CO)

<sup>b</sup>CH<sub>4</sub> conversion rate at 4 h
